# Supplementary material
Source: bioRxiv or medRxiv preprint supplement (https://www.biorxiv.org/highwire/filestream/36702/field_highwire_adjunct_files/9/125211-5.pdf)

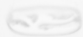

L

1

2

3

4

5

6

7

8

1500bp

700bp

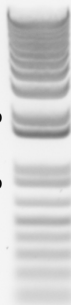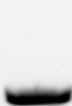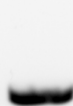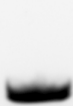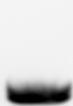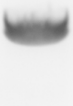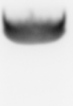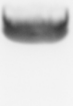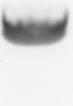

Supplement: Supplementary file [file 125211-5.pdf]
